1       **Experimental glaucoma retinal proteomics identifies mutually exclusive and**  
2                   **overlapping molecular characteristics with human glaucoma**

3

4 Mehdi Mirzaei<sup>1,2,3</sup> ❖, Vivek Gupta<sup>2</sup> ❖, Nitin Chitranshi<sup>2</sup> ❖, Liting Deng<sup>1</sup>, Kanishka  
5 Pushpitha<sup>2</sup>, Mojdeh Abbasi<sup>2</sup>, Joel Chick<sup>4</sup>, Rashi Rajput<sup>2</sup>, Yunqi Wu<sup>1,3</sup>, Matthew. J.  
6 McKay<sup>1,3</sup>, Ghasem H Salekdeh<sup>5</sup>, Veer Gupta<sup>6</sup>, Paul A. Haynes<sup>1</sup>, Stuart L. Graham<sup>2</sup>

7

8

9 <sup>1</sup>Department of Molecular Sciences, Macquarie University, Sydney Australia

10 <sup>2</sup>Department of Clinical Medicine, Macquarie University, Sydney Australia

11 <sup>3</sup>Australian Proteome Analysis Facility, Macquarie University Sydney Australia

12 <sup>4</sup>Department of Cell Biology, Harvard Medical School, Boston, Massachusetts, USA

13 <sup>5</sup>Department of Molecular Systems Biology, Cell Science Research Center, Royan,  
14 Institute for Stem Cell Biology and Technology, ACECR Tehran Iran

15 <sup>6</sup>School of Medicine, Deakin University, Melbourne Australia

16

17 ❖ Authors contributed equally to work

18

19

20 **Correspondence:**

21 Mehdi Mirzaei

22 Email: mehdi.mirzaei@mq.edu.au

23 Australian Proteome Analysis Facility|

24 Macquarie University | NSW 2109, Australia

25 Tel: +61 2 98508284

26

27 Vivek Gupta

28 Email: vivek.gupta@mq.edu.au

29 Faculty of Medicine and Health Sciences |

30 Macquarie University | NSW 2109, Australia

31 Tel: +61 9850 2760

32

33 **Abstract**

34 Current evidence suggests that exposure to chronically induced intraocular pressure  
35 (IOP) leads to neurodegenerative changes in the inner retina. This study aimed to  
36 determine retinal proteomic alterations in a rat model of glaucoma and compared  
37 findings with human retinal proteomics changes in glaucoma reported previously. We  
38 developed an experimental glaucoma rat model by subjecting the rats to increased IOP  
39 ( $9.3 \pm 0.1$  vs  $20.8 \pm 1.6$  mm Hg) by weekly microbead injections into the eye (8 weeks).  
40 The retinal tissues were harvested from control and glaucomatous eyes and protein  
41 expression changes analysed using multiplexed quantitative proteomics approach.  
42 Immunofluorescence was performed for selected protein markers for data validation.  
43 Our study identified 4304 proteins in the rat retinas. Out of these, 139 proteins were  
44 downregulated ( $\leq 0.83$ ) while expression of 109 proteins was upregulated ( $\geq 1.2$ -fold  
45 change) under glaucoma conditions ( $p \leq 0.05$ ). Computational analysis revealed reduced  
46 expression of proteins associated with glutathione metabolism, mitochondrial  
47 dysfunction/oxidative phosphorylation, cytoskeleton and actin filament organisation,  
48 along with increased expression coagulation cascade, apoptosis, oxidative stress and  
49 RNA processing markers. Further functional network analysis highlighted the  
50 differential modulation of nuclear receptor signalling, cellular survival, protein  
51 synthesis, transport and cellular assembly pathways. Alterations in crystallin family,  
52 glutathione metabolism and mitochondrial dysfunction associated proteins shared  
53 similarities between the animal model of glaucoma and the human disease condition.  
54 In contrast, the activation of the classical complement pathway and upregulation of  
55 cholesterol transport proteins, were exclusive to the human glaucoma. These findings  
56 provide insights into the neurodegenerative mechanisms that are specifically affected  
57 in the retina in response to chronically elevated IOP.

58

59

60 **Keywords:** Glaucoma, Neurodegeneration, Proteomics, Retina

## 61 **1 Introduction**

62 Glaucoma is a common neurodegenerative disease of the retina and is considered as a  
63 leading cause of irreversible blindness in the elderly population worldwide. Even  
64 though the exact pathophysiology of the disease remains incompletely understood, its  
65 association with increased intraocular pressure (IOP) and correlation with the retinal  
66 ganglion cell (RGC) death, as well as degeneration of their axons in the optic nerve, is  
67 well established [Chitranshi et al., 2018a].

68 Apart from mechanical or vascular effects of increased IOP, other complex risk factors  
69 have increasingly have been associated with the disease onset and progression,  
70 including family background, lifestyle, genetics, inflammation, epigenetic factors,  
71 secondary neurodegenerative effects of brain disorders, and old age progression  
72 [McMonnies, 2017]. Currently, the primary approach to slow down the progression of  
73 glaucoma is through reducing the IOP. Nevertheless, thinning of nerve fibre layer and  
74 progression of visual field defects continue to be widely reported in the glaucoma  
75 patients treated for IOP reduction. This suggests other mechanisms contribute to the  
76 disease pathogenesis and progression. There are patients, on the other hand, who exhibit  
77 clinical presence of high IOP without corresponding evidence of anatomical or  
78 functional damage to the visual system, indicating that elevated IOP may only  
79 constitute one of the several variables in the complex pathogenesis of glaucoma [Kass  
80 et al., 2002]. To make further advances in glaucoma diagnosis and develop alternative  
81 therapeutics, there is a need to systematically define the mechanisms underlying  
82 glaucoma. Distinguishing the molecular effects of IOP elevation from a more complex  
83 human glaucoma condition, where several other factors might be involved, will help in  
84 greater understanding of the disease process.

85 We recently carried out a comprehensive proteomics study in the post-mortem retinas  
86 from human POAG subjects and demonstrated that the pathology is associated with  
87 oxidative stress, mitochondrial dysfunction, dysregulation of immune response,  
88 disruption of neurotrophic factors and apoptosis activation in the retina [Mirzaei et al.,  
89 2017a]. Other proteomics studies in human tissues and animal models have indicated  
90 oxidative modification and other post-translational changes in various molecules  
91 [Bhattacharya et al., 2006; Tezel et al., 2005]. Enrichment of TNF $\alpha$  signalling pathways  
92 and mediation of immune response have also been suggested to play a role in the disease  
93 spectrum [Tezel, 2013; Tezel, 2014]. Funke et al. (2016) identified about 600 proteins  
94 from the glaucoma and control human retinal tissues using a label free quantitative

95 proteomics approach [Funke et al., 2016]. Proteomics analysis of the non-human  
96 primate retinas subjected to experimental glaucoma and optic nerve transection  
97 revealed protein changes with little overlap between the two conditions, indicating that  
98 mechanisms of RGC damage under these two experimental conditions can be  
99 completely different [Stowell et al., 2011]. Andres et al (2017), using the same label-  
100 free proteomics technique in an episcleral vein cauterization model, identified 931  
101 proteins that were altered in early phases of IOP increase [Anders et al., 2017]. These  
102 studies provided critical insights into the molecular pathogenesis of the disease,  
103 however, the latest proteomics technological advances in instrumentation, sample  
104 processing and preparation, and bioinformatics analysis tools have enabled us to  
105 achieve deeper proteome coverage. In this study, we carried out multiplexed proteomics  
106 using TMT SPS-MS3 method and identified about <4300 proteins in the retinas of  
107 microbead induced rat model of experimental glaucoma. This is a widely used chronic  
108 model of experimental glaucoma and our data reflects that pathways linked to  
109 mitochondrial function, cytoskeletal organisation and glutathione metabolism were  
110 negatively affected while proteins linked to oxidative stress and apoptotic processes  
111 were increased in expression. We analysed this data in the light of previously reported  
112 human glaucoma induced changes in the retina and vitreous [Mirzaei et al., 2017a] and  
113 this approach permitted us to establish the unique and shared proteins and pathways  
114 that are differentially affected under glaucoma conditions.  
115 Identification of these proteins and molecular networks is essential to understand the  
116 disease pathophysiology as well as develop target-based drugs and biomarkers for  
117 diagnostic applications. This data will serve as an important resource for glaucoma  
118 research and will help in comparing the proteomics changes in the retinas of microbead  
119 induced chronically increased IOP model with multifactorial human glaucoma  
120 condition.

121

122

## 123 **2 Results**

### 124 ***2.1 Quantitative analysis of retinal proteome using multiplexed TMT***

125 A total of 4304 reproducible proteins were identified and quantified from the retinal  
126 tissue (1% FDR) - see table 1 (<https://data.mendeley.com/research-data/>). The quality  
127 of the data and reproducibility of the biological replicates across groups were assessed  
128 using hierarchical clustering and statistical metrics. We observed great similarity in  
129 overall protein abundance distributions of individual biological replicates of both  
130 control and glaucoma conditions, confirming the reproducibility of the data for further  
131 analysis (Figure 2A). To identify the differentially proteins between glaucoma and  
132 control conditions, student's *t-test* was carried out. Proteins that met the *p*-value cut-off  
133 ( $\leq 0.05$ ) and at least 20% difference (Table 1) were considered as differentially  
134 modulated proteins. This two-step differential analysis of high IOP vs control retinas  
135 yielded 139 down regulated ( $p\text{-value} \leq 0.05$  and  $\leq 0.83$ -fold change) and 109 up-  
136 regulated ( $p\text{-value} \leq 0.05$  and  $\geq 1.2$ -fold change) proteins (Fig 2A, B). A list of top 50  
137 up- and down regulated proteins including their fold changes and their interaction  
138 network with *p*-value cut-off are shown in Fig. 2C, D. Several members of the crystallin  
139 family (aa, ba1, ba2, ba4, bb1, bb2, bb3,  $\gamma$ s), as well as other proteins including  
140 S100a10, S100a4, AHNAK, ANXA1, APOE, CSTS among others were prominently  
141 decreased while the expression of coagulation associated proteins including FGG,  
142 FGA, FGB, KNG1 and KNG2 were increased in high IOP exposed retinas (Fig. 2C,  
143 D).

144

### 145 ***2.2 Differentially regulated cellular pathways and protein networks in glaucomatous*** 146 ***retinas***

147 To visualize the protein interaction and networks among these differentially modulated  
148 proteins, we generated the retinal protein networks using the STRING and Cytoscape  
149 protein-protein interaction analysis tools. From 248 differentially expressed proteins,  
150 21 separate interconnected networks (Fig 3) were identified. Several molecular  
151 pathways were reduced in expression, including those involved in actin filament  
152 organisation, protein folding, cytoskeleton arrangement, calcium binding, oxidative  
153 phosphorylation, and glutathione metabolism. Other networks were increased in  
154 expression, such as coagulation, apoptosis and oxidative stress and cell signalling (Fig  
155 3). We performed cellular pathway enrichment and functional protein network analyses

156 on the 248 differentially expressed proteins to understand the molecular mechanisms  
157 and biological processes that are altered in the retina in response to exposure to  
158 increased IOP. Analysis of the differentially regulated proteins using Ingenuity  
159 Pathway Analysis (IPA) revealed that the top enriched disease and implicated  
160 biological functions were associated with pathways linked with neurodegenerative  
161 processes, modulation of nuclear receptors such as RAR and RXR, Tec kinase and  
162 interleukin signalling, mitochondrial dysfunction, fatty acid oxidation and acute phase  
163 response signalling (Fig. 4). Overall, the combination of canonical IPA pathway and  
164 STRING/ Cytoscape protein-protein network analysis allowed us to visualize the most  
165 significantly differentially affected biological processes in the retina of experimental  
166 glaucoma model.

167

### 168 ***2.3 Redox regulation and oxidative phosphorylation in glaucoma***

169 Mitochondrial dysregulation and impaired oxidative phosphorylation have been  
170 implicated strongly in glaucoma pathogenesis [Lee et al., 2011]. A major role of  
171 mitochondria is the generation of ATP through oxidative phosphorylation and the  
172 regulation of cell death by apoptosis [Hüttemann et al., 2007; Kong et al., 2009]. High  
173 energy requirements of the RGCs make them particularly susceptible to anomalies  
174 associated with mitochondrial function. We observed reduced abundance of  
175 mitochondrial ATP synthase (ATP 5E) and V-type proton ATPase (ATP6v1g1). The  
176 oxidative phosphorylation and mitochondrial proteins COX1, Pcd5, Tgm2 and  
177 Ndufa2 were also identified in the list of differentially expressed proteins in glaucoma  
178 condition (Fig. 3). It is well documented that IOP increase in glaucoma induces  
179 oxidative stress in RGCs through reduced activity of key antioxidant enzymes (e.g;  
180 glutathione peroxidases) which are responsible for fighting against oxidative stress  
181 [Moreno et al., 2004]. Stress associated proteins such as glutathione metabolic proteins,  
182 which are involved in mediating protection of cells against oxidative stress by  
183 neutralising highly reactive free radical species, namely GPX1, GSS, GSTM1/2, were  
184 significantly downregulated while GSTT3 was observed to be upregulated in glaucoma  
185 retinas. Mitochondrial impairment may alter NADPH levels and has been shown to  
186 contribute to dysregulated oxidoreductase activity in the cells. In this study we  
187 identified that the retinal tissues exposed to high IOP demonstrated reduced levels of  
188 aldose reductase (Akr1b1), aldehyde dehydrogenase (Aldh1a1, Aldh2), enolase  
189 (Enoph1), acyl dehydrogenase (Hadh) and phosphoglycerate dehydrogenase (Phgdh)

190 enzyme subunits. We also observed upregulation of carbonic anhydrase (Car1), retinal  
191 dehydrogenase (RDH12), protein kinase C (Prkce) and NAD dependent 17  $\beta$ -  
192 dehydrogenase (Hsd17b8) enzymes (Fig. 3). These proteins are involved in regulating  
193 oxidoreductase activity and NAD binding suggesting that these pathways were  
194 negatively impacted in the retinas in response to chronic exposure to high IOP (Fig. 3  
195 and Table 1).

196

#### 197 ***2.4 Effects of glaucoma on actin filament organisation and cytoskeletal dynamics***

198 The internal scaffolding of cells is affected in glaucoma with trabecular meshwork,  
199 optic nerve and lamina cribrosa exhibiting profound reorganisation of the actin filament  
200 networks [Clark et al., 1995; Hoare et al., 2009; Job et al., 2010]. The internal  
201 architecture is particularly important to maintain the biomechanical properties and  
202 axonal support. We observed consistent downregulation of the proteins associated with  
203 actin skeletal organisation and protein folding in the retina under glaucomatous  
204 conditions. We identified 9 members of the crystallin family that were downregulated  
205 in glaucoma condition (Cryaa, Cryba2, Crygs, Cryab, Crybb1, Cryba4, Cryba1,  
206 Crybb2, Crybb3) (Fig. 3, Fig. 5, Fig 6). Crystallins are primarily heat shock proteins  
207 that are involved in regulating the actin and intermediate filament  
208 cytoskeleton dynamics and protect the cells against stress [Launay et al., 2006].  
209 Reduced levels of Connexin 50 (Gja8) and Griffin cell junction proteins that are  
210 involved in mediating cell-cell interactions and cytoskeletal binding were observed in  
211 the retinal tissues subjected to high IOP. Our proteomics datasets also included proteins  
212 associated with cytoskeleton arrangement and protein folding. Tropomyosin isoforms  
213 (Tpm1, Tpm3, Tpm 4), which are considered primary regulators of F-actin  
214 cytoskeleton, were downregulated in the retinas under glaucomatous conditions. As a  
215 matter of interest, pseudokinase Camkv, that may act as scaffold and spatial anchor for  
216 cytoskeletal proteins and is also involved in dendrite physiology, was prominently  
217 upregulated in the retinas [Jacobsen and Murphy, 2017]. Similarly, Calml3 and Coro1a  
218 were overexpressed under the glaucomatous conditions; Calml3 has previously been  
219 shown to be differentially regulated in POAG [Liu et al., 2013].

220

#### 221 ***2.5 Impaired RNA metabolism and SNARE complex machinery***

222 RNA metabolism was another major cellular process that was impacted in the retinas  
223 exposed to glaucomatous injury. We identified six upregulated and six downregulated

224 proteins that have previously been implicated in regulating RNA metabolism,  
225 suggesting that RNA processing was negatively impacted. Atg7 has been shown to  
226 mediate axonal preservation [Komatsu et al., 2007] and was overrepresented in  
227 glaucomatous retinas. Stat5a levels were also enhanced in response to high IOP injury,  
228 which corroborates the previous reports of increased levels of Stat5a mRNA in RGCs  
229 in response to experimental glaucoma [Wang et al., 2010]. Igfbp7 levels, in contrast,  
230 were significantly downregulated under high IOP. This protein has also been shown to  
231 be suppressed in response to hypoxia in the retinas in a mouse model of oxygen induced  
232 retinopathy [Ishikawa et al., 2010].

233 In addition to the RNA metabolism, our data suggests significant perturbation of  
234 SNARE machinery associated proteins that regulate formation of membrane vesicles  
235 as well as the timing and specificity of vesicular fusion [Manca et al., 2019; McKay et  
236 al., 2013]. Myocilin has been suggested as a part of the SNARE like complex based on  
237 its homology with Q- SNAREs [Dismuke et al., 2012]. We identified 9 proteins  
238 associated with the intracellular SNARE transport complex to be differentially  
239 regulated in the retinas of high IOP exposed animals. Sec23b and Stx5 proteins which  
240 are involved in ER-Golgi transport [Liang et al., 2018] were observed to be upregulated  
241 (Fig. 3). On the other hand, Importin proteins (IPO5 and 9), that mediate energy  
242 dependent transportation through the nuclear pore, were downregulated [Alqawlaq et  
243 al., 2012] along with other SNARE proteins such as Cops8, Cplx2, Gorasp2, Manf and  
244 Stx4. Perturbations in SNARE machinery might play a role in dysregulation of  
245 intracellular processes including autophagosome fusion with lysosomes, leading to  
246 impaired cargo transport and recycling, which are pathological processes implicated in  
247 glaucoma [Frost et al., 2014; Porter et al., 2013; Swarup and Sayyad, 2018].

248

## 249 ***2.6 Molecular overlap of protein networks in human and experimental glaucoma***

250 The rat experimental glaucoma data obtained in this study was compared with our  
251 previously published [Mirzaei et al., 2017a] retinal and vitreous proteomics data from  
252 human POAG tissues. Pathway analysis revealed 65 proteins that were common  
253 between the two sets and differentially modulated. A majority of the common  
254 differentially expressed proteins were downregulated under both these conditions.  
255 Overall, fifty proteins shared a similar expression pattern, amongst these 41 were down-  
256 and 9 up- regulated across both systems. Further analysis indicated that within the  
257 downregulated set, 9 proteins belonged to the crystallin family that is associated with



258 protein folding (Cryaa, Cryba2, Crygs, Cryab, Crybb1, Cryba4, Cryba1, Crybb2,  
259 Crybb3), 3 members to glutathione synthesis pathway (gss, gstm1, gstm2), two were  
260 Annexin proteins (anaxa6, anaxa1), and two were S100 proteins (s100a4, s100a10)  
261 (Fig. 5A, B). To explore the differential regulation of crystallins, which was identified  
262 as one of the most prominent protein groups modulated across rat and human data sets,  
263 we subjected both rat and human retinal sections to immunofluorescence analysis using  
264 selected crystallin antibodies ( $\alpha\beta$ ,  $\beta$ B2 and  $\beta$ B3) (Fig. 6). The results validated our MS  
265 findings and demonstrated noticeable downregulation of expression of each of these  
266 isoforms in glaucoma conditions. The downregulation was particularly localised to the  
267 GCL in the inner retina, a region that is preferentially affected in glaucoma. The shared  
268 up-regulated proteins included glycoprotein m6a (gpm6a), glycoprotein m6b (gpm6b),  
269 synaptic vesicle glycoprotein 2A (sv2), DmX-like protein 2 (dmxl2), C-terminal-  
270 binding protein 2 (ctbp2), G Protein Subunit  $\beta$  3 (gnb3), carbonic anhydrase 1 (ca1),  
271 retinoschisin (rs1), and coronin1A (coro1a) (Fig. 5A). However, this also means that a  
272 substantial number of uniquely affected pathways were also identified in both the  
273 human and rat experimental glaucoma conditions. Another noticeable observation in  
274 these sets was with respect to the 15 proteins that were differentially modulated but  
275 followed an opposite pattern of abundance. Prominent amongst these were fibrinogen  
276 subunit (fgg), c-reactive protein (crp), proteasome activator (psme2) and apolipoprotein  
277 E, listed in 5A. With this approach, we noted shared differential regulation of proteins  
278 implying similar changes in both the data sets in molecular pathways that are involved  
279 in mediating retinal structure and development, ageing, apoptotic processes and  
280 regulating axonal health. (Fig. 5B).

281

### 282 **3 Discussion**

283 This study aimed to investigate the molecular basis of glaucoma pathogenesis by taking  
284 a systems-level perspective of the experimental glaucoma retinal proteome in  
285 microbead model using an unbiased quantitative proteomics approach. We analysed  
286 molecular similarities and difference between a glaucoma model and the human POAG  
287 condition, by comparing the animal retinal proteome against our previously published  
288 human data [Mirzaei et al., 2017a]. To our knowledge, this is the most comprehensive  
289 retinal proteome profile in a chronic model of experimental glaucoma, and provides  
290 validation of several protein markers recently identified in human glaucoma tissues  
291 [Mirzaei et al., 2017a]. Over 4300 proteins were identified with expression of 248

292 proteins differentially modulated in retina in response to sustained exposure to  
293 increased IOP. The study revealed that key pathways involved in cellular stress and  
294 tissue homeostasis were affected in the retina under high IOP conditions. Using a  
295 combination of functional pathway and protein-protein interaction analysis tools  
296 enabled us to identify the specific pathways, which were down regulated or induced in  
297 animal model of high IOP. In agreement with human data, this study revealed down  
298 regulation of proteins associated with oxidative phosphorylation, glutathione  
299 biosynthesis, protein folding, actin filament organisation, and cytoskeleton protein  
300 networks. Coagulation cascade was amongst the mutually upregulated pathways in both  
301 human and animal model. In accordance with the complex nature of human glaucoma  
302 condition, the study revealed that a large series of biochemical pathways were affected  
303 in the human glaucoma retina in contrast to the high IOP exposed rat model.

304 In this study, we identified 11 members of crystallin family as significantly down  
305 regulated in glaucoma samples. All these crystallins were embodied in the top 50 down  
306 regulated proteins as presented in figure 2C. The STRING protein interaction analysis  
307 revealed that crystallins are associated with actin filament organisation and protein  
308 folding biological processes. Crystallins belong to the family of small heat shock  
309 proteins and consist of three main sub families ( $\alpha$ ,  $\beta$ , and  $\gamma$  crystallins), which are  
310 expressed in RGCs [Liedtke et al., 2007; Piri et al., 2007]. Of these 11 proteins, 6  
311 belonged to the  $\beta$  (CRYBA1, CRYBA2, CRYBA4, CRYBB1, CRYBB3, CRYBB2,  
312 CRYBB1), 3 to  $\alpha$  (CRYAA, CRYAA-isoform 2 and CRYAB) and 2 to the  $\gamma$  family  
313 (CRYGN and CRYGS). Differential expression of crystallins has been reported in  
314 number of neurodegenerative disorders including glaucoma [Piri et al., 2007; Prokosch  
315 et al., 2013]. Human glaucoma patients have been reported to exhibit increased titer  
316 values of antibodies against small HSPs [Tezel et al., 1998]. Crystallins play a role as  
317 a molecular scaffold and potential modulator of important signalling molecules in  
318 glaucoma, and thus are integral to the process of glaucomatous neurodegeneration  
319 [Tezel et al., 1998]. Immunofluorescence analysis of the crystallin expression changes  
320 revealed a consistent downregulation of various crystallin isoforms in both rat and  
321 human tissues. This downregulation was particularly localised to the GCL region and  
322 indicates that crystallin changes in glaucoma are likely induced by exposure to  
323 chronically elevated IOP.

324 In addition to the crystallins, another network associated with cytoskeleton and protein  
325 folding that was differentially modulated was the down regulation of 3 tropomyosin

326 members (TPM1, TPM3 and TPM4) along with reduction in protein levels of TUBB6,  
327 VBP1, PFDN2, IQGAP2, ARVCF and AHNAK. In contrast, cytoskeletal proteins such  
328 as CORO1A and DNAH7, and signalling proteins such as AKTIP, CAIM3 and  
329 CAMKV were up regulated. This is consistent with previous studies that have indicated  
330 reduction in the levels of Camkv protein in rat model of ischemia reperfusion injury  
331 [Tian et al., 2014].

332 Besides modulation of heat shock and cytoskeletal proteins, Ca<sup>2+</sup> binding proteins such  
333 as S100A10, S100, FBN1 and LGALS1 were identified to be downregulated and these  
334 proteins interact with other downregulated proteins such as ANAX6, ANAX1, APOE,  
335 NEK9, MFAP2, and HSPG2. This interconnected network was largely downregulated,  
336 however, synaptic vesicle glycoproteins 2A and 2C, that have a direct interaction with  
337 HSPG2, and KNG1 that interacts with Anxa1, were significantly enriched.

338 Increased expression of proteins associated with coagulation cascade (FGG, FGB and  
339 FGA) was also evident in glaucomatous retinas. Activation of coagulation cascade is  
340 associated with inflammatory processes in a number of neurodegenerative diseases,  
341 including glaucoma. The mechanisms by which the coagulation system is altered  
342 comprises enhanced synthesis and activation of coagulant proteins, decreased synthesis  
343 of anticoagulants, and suppression of fibrinolysis. However, not only does  
344 inflammation activate coagulation, but this may lead to a vicious cycle, where  
345 coagulation in turn perpetuates inflammatory response [Levi and van der Poll, 2010].

346 A prominent downregulation of oxidative phosphorylation enzymes was detected in the  
347 rat retinas, similar to the mitochondrial suppression demarcated by downregulation of  
348 electron transport chain and mitochondrial ribosomal proteins reported in human  
349 glaucoma tissues [Mirzaei et al., 2017a]. Mitochondrial compromise has been  
350 extensively reported in animal models and in human glaucoma condition  
351 [Chrysostomou et al., 2013; Munemasa et al., 2010]. RGCs, being metabolically highly  
352 active, constitute a cell population that is decidedly susceptible to mitochondrial failure.  
353 Modulating mitochondrial integrity, such as by inducing DRP1 inhibition or CoQ<sub>10</sub>  
354 treatment, has been shown to rescue RGCs in glaucoma [Kim et al., 2015; Lee et al.,  
355 2014; Lee et al., 2011]. Mitochondrial dysfunction, in turn, affects the NAD/NADH  
356 levels and here we observed downregulation of certain key redox regulatory enzymes  
357 in response to high IOP exposure, such as aldehyde dehydrogenase, enolase, aldose  
358 reductase, acyl dehydrogenase, and phosphoglycerate dehydrogenase. We have  
359 previously reported downregulation of 13 subunits of the NADH dehydrogenase:

360 ubiquinone oxidoreductase complex 1 in the human POAG, and these findings together  
361 may reflect a failure of the tissues to maintain redox homeostasis in glaucoma. Williams  
362 et al. (2017) demonstrated that administration of the NAD precursor niacin, and gene  
363 therapy driving expression of *Nmnat1*, a key NAD<sup>+</sup>-producing enzyme, modulated  
364 mitochondrial vulnerability and prevented experimental glaucoma in ageing animals  
365 [Williams et al., 2017].

366 In a network associated with ion transport across membranes, 3 members of the SLC4  
367 gene family were upregulated in glaucoma; SLC4A2, SLC4A3 and SLC4A5. The  
368 modulation of the SLC4 gene family has been linked to ocular and corneal diseases in  
369 humans. Mutations in SLC4A4 in addition to their role in renal acidosis are implicated  
370 in ocular anomalies including glaucoma [Horita et al., 2018]. Furthermore, 3 proteins  
371 associated with apoptotic pathways (BIRC6, TRAF3 and TNIK) were recognized as  
372 enriched in glaucoma conditions. BIRC6 protein (baculovirus IAP repeat containing  
373 protein 6) is a member of the inhibitor of apoptosis gene family, which encodes  
374 negative regulatory proteins that play a preventative role in apoptotic cell death. The  
375 proteolytic activity of caspases is tightly controlled by the family of inhibitors of  
376 apoptosis which are normally induced in the chronic inflammation in cancers and  
377 neurodegenerative diseases. TRAF proteins are essential components of signalling  
378 pathways activated by TNFR or Toll-like receptor family members. TRAF3 is reported  
379 to be a highly versatile regulator that positively controls type I interferon production,  
380 but negatively regulates MAP kinase activation and alternative nuclear factor- $\kappa$ B  
381 signalling [Cai et al., 2013]. TNIK, in contrast, is a member of the germinal center  
382 kinase family, and is widely involved in cytoskeleton organization, neuronal dendrite  
383 extension, cell proliferation, and glutamate receptor regulation. Notably, an emerging  
384 body of evidence suggests that TNIK is a novel activator of Wnt signalling [Yu et al.,  
385 2014], and the Wnt pathway plays critical roles in the regulation of many cellular  
386 functions, including cellular proliferation, differentiation, migration, and maintenance  
387 of pluripotency. However, although GWAS linked variants have been reported with  
388 respect to TNIK [Zagajewska et al., 2018]; to our knowledge, changes in regulation of  
389 TNIK protein has not been reported in any previous glaucoma study.

390 In this report, we have shown that high IOP subjected rat retinas demonstrated shared  
391 components of several tissue stresses, and adaptive or neuroprotective responses that  
392 were also identifiable in human glaucoma subjects [Mirzaei et al., 2017a]. Notably,  
393 many biochemical networks such as modulation of cholesterol transport proteins and

394 classical complement activation were uniquely affected in the human eyes [Mirzaei et  
395 al., 2020]. It is important to emphasise that the responses detected in rat retinas were  
396 caused by IOP increase alone without any underlying manifest neurodegenerative or  
397 vascular pathology. This is a limitation of the current glaucoma models being used in  
398 research, nevertheless, the molecular data helps to dissect various components of the  
399 glaucoma pathology as a complex neurodegenerative/ vascular disorder. In this study  
400 we have analysed the proteome of the whole retinal tissues, which limits our ability to  
401 distinguish the individual contribution of distinct cell types that comprise the retina.  
402 This limitation has been extensively discussed in our previous study analysing the  
403 human glaucoma retinal tissues [Mirzaei et al., 2017a]. Further, a different  
404 experimental design in which animal retinal tissues are harvested at intermediate time  
405 points will help us understand the chronology of biochemical changes that occur in  
406 response to chronically elevated IOP exposure.

407 In conclusion, the proteomics data provides new insights into a purely high IOP induced  
408 scenario for retinal changes, without the complex interplay of ageing, genetic or  
409 systemic factors and drug effects, which are inevitable confounding variables in human  
410 cohort studies. Future research will help elucidate the individual effects of various risk  
411 factors in glaucoma, to help us better understand the disease process and thereby  
412 develop new therapeutic strategies.

413

## 414 **4 Material and Methods**

### 415 **4.1 Animals**

416 Adult male Sprague-Dawley rats (n=10) were used for the experiments (High  
417 IOP/glaucoma: 5, control: 5). All animals were maintained at controlled temperature  
418 ( $21 \pm 2^\circ\text{C}$ ) for 12-hour light/dark cycles. All procedures were performed in accordance  
419 with the Australian Code of Practice for the Care and Use of Animals for Scientific  
420 Purposes and the guidelines of the ARVO Statement for the Use of Animals in  
421 Ophthalmic and Vision Research. The animals were subjected to anaesthesia using  
422 intraperitoneal (i.p.) administration of ketamine (75 mg/kg) and medetomidine (0.5  
423 mg/kg)[You et al., 2012] for the microbead injections[Chitranshi et al., 2018b].

424

### 425 **4.2 Intra-ocular injections and pressure measurements**

426 An experimental glaucoma model was established by producing a chronic increase of  
427 intra-ocular pressure (IOP) in mice by microbead (Fluospheres, Molecular Probes, 10

428  $\mu\text{m}$ ) injections in the anterior chamber as reported previously [Chitranshi et al., 2019;  
429 Gupta et al., 2014; You et al., 2014]. Intraocular injections ( $3.6 \times 10^6$  microbeads/mL)  
430 in the anterior chamber of the eye were performed until a sustained increase in IOP was  
431 observed. Eyes were injected using a 25- $\mu\text{L}$  Hamilton syringe connected to a disposable  
432 33-gauge needle (TSK, Japan). All intracameral procedures were performed under  
433 magnification using an operating microscope (Carl Zeiss, Germany) with care taken to  
434 avoid needle contact with the iris or lens. The needle was inserted bevel down,  
435 tangentially beneath the corneal surface, to facilitate self-sealing of the puncture  
436 wound. Once the needle tip was visualised within the anterior chamber, 2  $\mu\text{L}$  microbead  
437 solution was injected. At the end of the procedure, anaesthesia was reversed using  
438 atipamazole (0.75 mg/kg subcutaneous injection, and 0.3% ciprofloxacin drops  
439 (Ciloxan; Alcon, Australia) and 0.1% dexamethasone eye drops (Maxidex, Alcon) were  
440 instilled in both eyes. An ointment (Lacri-lube; Allergan, Australia) was also applied  
441 to protect against corneal drying until the animal recovered. During anaesthesia and  
442 prior to each injection, IOP was measured by using a handheld electronic tonometer  
443 (Icare Tonovet, Finland). The IOP displayed on the tonometer was the mean of six  
444 consecutive measurements. Three consecutive IOP readings were obtained from each  
445 eye and the average number was taken as the IOP for that time point.

446

#### 447 **4.3 Preparation of protein samples**

448 The retinas of experimental glaucoma (n=5) and control animals (n=5) were extracted  
449 from the eyes using the surgical microscope. Protein extraction was carried out using  
450 lysis buffer (20 mM HEPES, pH 7.4, 1% Triton X-100, 1 mM EDTA) containing  
451 protease and phosphatase inhibitors. Samples were subjected to probe sonication (3  
452 pulses/15s with 20s between each pulse). Lysed samples were centrifuged (15,000 g  
453 for 10 min at 4°C) and protein in the supernatant concentrated by precipitation using a  
454 chloroform methanol precipitation procedure [Wessel and Flügge, 1984]. Precipitated  
455 protein was resuspended in 200  $\mu\text{L}$  of 8M Urea in 50 mM Tris (pH 8.8). Protein  
456 concentration was determined using a BCA assay (Pierce, Rockford, USA) and bovine  
457 serum albumin (BSA) as a standard. Solubilised proteins were reduced using 5mM  
458 DTT and alkylated using 10mM iodoacetamide. Proteins (150  $\mu\text{g}$ ) were initially  
459 digested at room temperature overnight using a 1:100 enzyme-to-protein ration using  
460 Lys-C (Wako, Japan), followed by digestion with Trypsin (Promega, Madison, WI) for  
461 at least 4 hours at 37 °C also at a 1:100 enzyme-to-protein ratio.. Resultant peptides

462 were acidified with 1% TFA and purified using SDB-RPS (Empore) Stage Tips [Kulak  
463 et al., 2014].

464

#### 465 ***4.4 TMT labelling and liquid chromatography electrospray ionization tandem mass*** 466 ***spectrometry (LC-ESI-MS/MS)***

467 Details of the 10 plex TMT experimental workflow are shown in figure 1. Briefly,  
468 peptides (70 µg) from each retinal sample were subjected to TMT labelling as outlined  
469 in our previous study on human glaucoma retinal tissues [Mirzaei et al., 2017a]. Briefly,  
470 pooled and labelled peptides were separated into 12 fractions following HpH  
471 chromatography and dried by vacuum centrifugation. Peptide fractions were analysed  
472 by nano-LC-MS/MS using an ultra-high-pressure liquid chromatography system  
473 (Proxeon) and an Orbitrap Fusion Tribrid-MS (Thermo Scientific, USA) mass  
474 spectrometer. Peptide fragmentation was performed using the (SPS)-MS<sup>3</sup> method  
475 described previously [McAlister et al., 2014].

#### 476 ***4.5 Database searching/quantification and statistical analysis***

477 Charge state and monoisotopic m/z values were corrected using a method previously  
478 detailed by Huttlin et al [Huttlin et al., 2015]. Spectra were search against an indexed  
479 *Rattus norvegicus* Uniprot database using the Sequest search algorithm and included  
480 carbamidomethylation of cysteine residues, and TMT labelling of peptide N-termini  
481 and lysine residues as static modifications, oxidation of methionine as a dynamic  
482 modification, and a precursor ion tolerance of 20 ppm and fragment ion tolerance of  
483 0.8 Da. A linear discriminant analysis was used to filter Sequest matches to a false  
484 discovery rate (FDR) of 1% at the peptide level based on matches to reversed sequences  
485 [Elias and Gygi, 2010]. Protein were ranked by multiplying peptide probabilities and  
486 the dataset was finally filtered to 1% protein FDR. TMT reporter ion quantification was  
487 assessed using the strategy described previously [Chick et al., 2016; McAlister et al.,  
488 2012]. Peptides with a total signal-to-noise (S/N) for all channels of >200 with a  
489 precursor isolation specificity of >0.75 were used for quantification. TMT reporter ion  
490 intensity values were normalized by summing values across all peptides within each  
491 channel then correcting each channel to the same summed value. Protein level  
492 quantification was performed using normalized S/N values for all peptides assigned to  
493 a given protein. Differentially expressed proteins were assessed using a two-sample t-  
494 test ( $p \leq 0.05$ ) and a fold change threshold ( $\geq 1.2$  for up-regulation or  $\leq 0.83$  for down-

495 regulation). Reproducibility of the TMT experiment was evaluated further using our in-  
496 house ‘TMTPrepPro’ software reported previously [Mirzaei et al., 2017b].

497

498

#### 499 ***4.6 Bioinformatics and functional pathway analysis***

500 Functional pathway enrichment and protein-protein interaction analysis of  
501 differentially modulated proteins were performed using Ingenuity pathway analysis  
502 (IPA) and STRING protein-protein network analysis [Szklarczyk et al., 2015] as  
503 described previously [Mirzaei et al., 2017a]. For Ingenuity, the canonical pathway  
504 analysis highlighted the function-specific genes present in each networks. STRING  
505 Cytoscape plug-in assisted in detecting the protein-protein interactions as well as  
506 classifying the differentially modulated pathways and networks.

507

#### 508 ***4.7 Tissue Sectioning and Immunofluorescence Analysis***

509 Rats eyes were enucleated following the transcardial perfusion with 4%  
510 paraformaldehyde. The eyeballs were further subjected to PFA treatment for 1 h. The  
511 eye tissues were rinsed 3 times with 0.9 % saline and dropped into 30% sucrose solution  
512 till the tissues sank to the bottom. The eyeballs were embedded in OCT media and 10-  
513 15- $\mu$ m thick retinal sections were cut with the help of cryostat and dipped into ice-cold  
514 ethanol for tissue permeabilization for antibody treatment. The sections were blocked  
515 with serum treatment and subjected to incubation with primary antibodies (1:300). The  
516 eye sections were subsequently incubated with secondary antibodies (1:400 in Tris  
517 phosphate saline buffer) as indicated for 1 hour in the dark room and mounted using  
518 antifade media containing DAPI for nuclear staining. The images were obtained using  
519 Carl Zeiss microscopes and data analysed. PFA fixed human eyes were similarly  
520 washed with 0.9% saline and embedded in OCT media. The sections were cut using  
521 cryostat, stained with crystalline antibodies and images captured as described above.

522

523



524 **5. Conclusion**

525 In present study, we aimed to investigate shared retinal protein components from  
526 experimental glaucoma and human glaucoma subjects. We identified that  
527 experimentally elevated IOP in rat retinas shared components of several tissue stresses  
528 and adaptive or neuroprotective responses that were also identifiable in post-mortem  
529 retinal tissue from human glaucoma subjects. Notably, many biochemical networks  
530 such as modulation of cholesterol transport proteins and classical complement  
531 activation were uniquely affected in the human eyes. It is important to emphasise that  
532 the responses detected in rat retinas were caused by IOP increase alone without any  
533 underlying manifest neurodegenerative or vascular pathology. This is a limitation of  
534 the current glaucoma models being used in research; nevertheless, the molecular data  
535 helps to dissect various components of the glaucoma pathology as a complex  
536 neurodegenerative/ vascular disorder. In addition, the proteomics data provides new  
537 insights into a purely high IOP induced scenario for retinal changes, without the  
538 complex interplay of aging, genetic or systemic factors and drug effects, which as  
539 inevitable confounding variables in human cohort studies. Future research will  
540 elucidate the individual effects of various risk factors in glaucoma and help us to better  
541 understand the disease process and thereby develop new therapeutic strategies.

542

543

544 **Acknowledgments** We acknowledge funding support from the Australian Government  
545 National Collaborative Research Infrastructure Scheme (NCRIS), National Health and  
546 Medical Research Council (NHMRC) Australia, Ophthalmic Research Institute of  
547 Australia (ORIA) and Macquarie University, NSW, Australia.

548 **Conflict of interest** All authors declare no competing financial interests in the  
549 findings of this study.

550

551

**Figure 1**

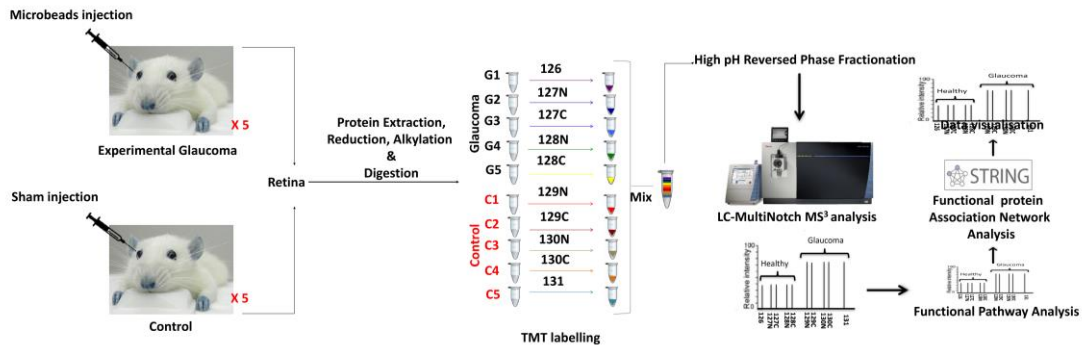

552

553 **Figure 1** Experimental design and TMT labelling workflow of the experimental  
 554 glaucoma study. Retinas from control and high IOP rats were harvested (n = 5 each).  
 555 Extracted proteins from these retinas were alkylated and digested with Lys-C and  
 556 Trypsin after reduction. The samples were labelled with 10 plex TMT, fractionated and  
 557 analysed by LC-ESI-MS/MS on ThermoFisher Orbitrap Fusion mass spectrometer  
 558 (SPS-MS3 method).

559

560

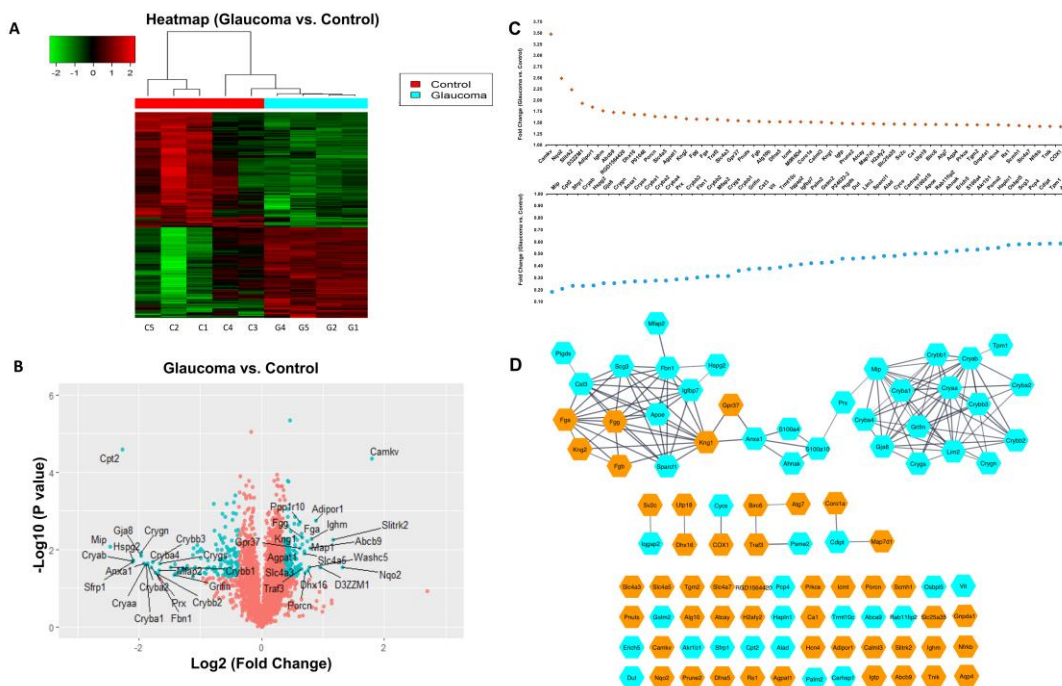

561

562 **Figure 2** (A) Heatmap (hierarchical clustering) of the log-transformed ratios of  
 563 differentially expressed proteins from retinal samples (glaucoma vs. control). Red and  
 564 green colour-coding indicate relative increase or decrease in protein abundance,

565 respectively. (B) Volcano plots representing the expression of differentially regulated  
 566 proteins. The x-axis represents log<sub>2</sub> fold change in abundance in glaucoma versus  
 567 controls. Proteins above the horizontal dotted line indicate significance  $\leq 0.05$ . Samples  
 568 that lie in upper and outer quadrants are considered as differentially regulated in  
 569 glaucomatous conditions. Dots with labelling are the top 50 up and down regulated  
 570 proteins, respectively. (C) Fold changes of the top 50 up (red colour) and down (green  
 571 colour) regulated proteins in rat retina with glaucoma are indicated in the graph. (D)  
 572 Network generated with the top 50 up- and down- regulated proteins using Cytoscape  
 573 String plugin. The orange and green colours represent the up- and down-regulated  
 574 proteins respectively.  
 575

**Figure 3**

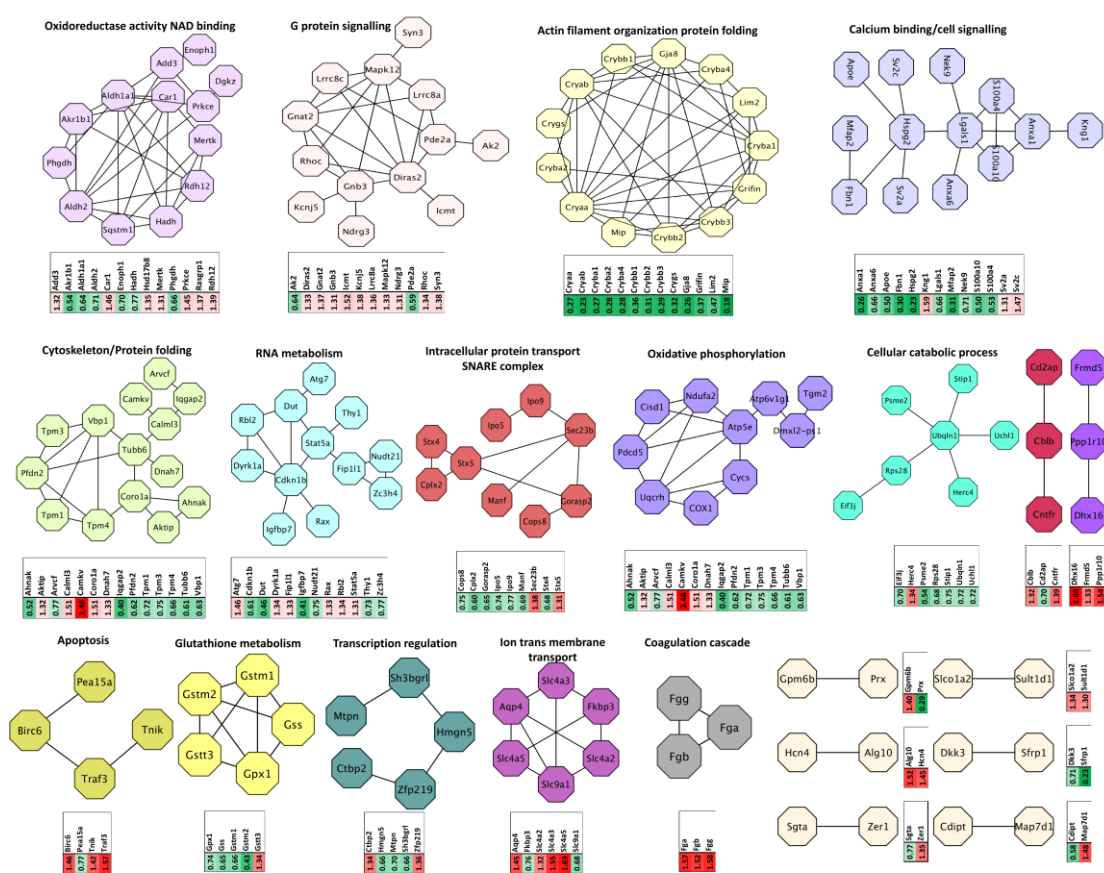

576  
 577 **Figure 3** Functional interaction networks analysed by the String Cytoscape plugin. 143  
 578 differentially expressed proteins were in generated pathways. Network nodes are  
 579 labelled with gene symbols, and the corresponding fold changes are indicated below  
 580 using mini heatmaps. The enriched networks such as oxidoreductase activity, G-protein

581 signalling, cytoskeletal organisation, Ca<sup>2+</sup> binding, oxidative phosphorylation, RNA  
 582 metabolism are shown (red- upregulated; Green- downregulated).

583

**Figure 4**

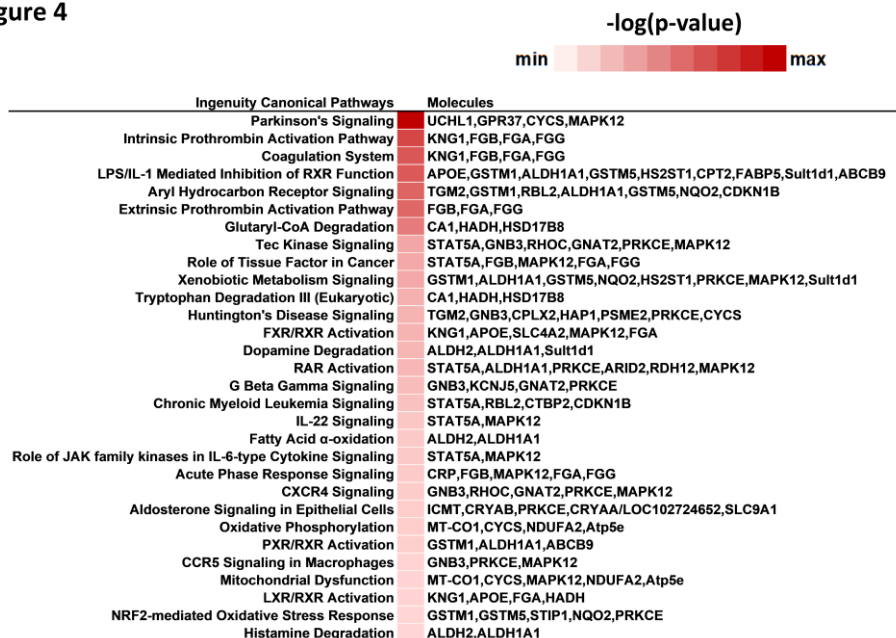

584

585 **Figure 4** The top 30 canonical pathways enriched from IPA analysis of differentially  
 586 regulated proteins in retina (glaucoma vs. control). Heatmap of the log transformed  
 587 abundance ratios representing top disease related biological pathways and differentially  
 588 affected associated markers in the retina in high IOP exposed eyes. The red colour  
 589 indicates the significance of the functional enrichment. Proteins in specific pathways  
 590 are also listed

591

Figure 5A

| Description                                            | Gene ID  | Rat   | Human  |
|--------------------------------------------------------|----------|-------|--------|
| Beta-crystallin A2                                     | cryba2   | -3.62 | -17.96 |
| Beta-crystallin A3                                     | cryba1   | -3.68 | -15.62 |
| Beta-crystallin A4                                     | cryba4   | -3.62 | -13.79 |
| Beta-crystallin B2                                     | crybb2   | -3.21 | -13.23 |
| Beta-crystallin B1                                     | crybb1   | -2.79 | -11.79 |
| Gamma-crystallin 5                                     | cryg5    | -3.17 | -11.56 |
| Alpha-crystallin A chain                               | cryaa    | -2.33 | -8.26  |
| Alpha-crystallin B chain                               | cryab    | -4.27 | -7.43  |
| Beta-crystallin B3                                     | crybb3   | -3.42 | -6.99  |
| Fibrillin-1                                            | fbn1     | -3.32 | -5.67  |
| Microfibrillar-associated protein 2                    | mfap2    | -3.19 | -4.13  |
| Retinal dehydrogenase 1                                | aldh1a1  | -1.57 | -2.35  |
| Metallothionein-3                                      | mt3      | -1.60 | -2.27  |
| Anion exchange protein 2                               | slc4a2   | 1.32  | -2.09  |
| Glutathione S-transferase Mu 1                         | gstm1    | -1.52 | -1.95  |
| Tropomyosin alpha-1 chain                              | tpm1     | -1.71 | -1.87  |
| Calcium-regulated heat-stable protein 1                | carhsp1  | -2.03 | -1.87  |
| Ubiquitin carboxyl-terminal hydrolase isozyme L1       | uchl1    | -1.40 | -1.73  |
| Protein S100-A4                                        | s100a4   | -1.88 | -1.69  |
| Myotrophin                                             | mtpn     | -1.43 | -1.68  |
| Protein prune homolog 2                                | prune2   | 1.48  | -1.68  |
| Hyaluronan and proteoglycan link protein 1             | hapln1   | -1.82 | -1.67  |
| Annexin A6                                             | anxa6    | -1.51 | -1.63  |
| Caveolae-associated protein 2                          | sdpr     | -1.35 | -1.60  |
| Fatty acid-binding protein 5                           | fabp5    | -1.65 | -1.58  |
| Transcription elongation factor A protein-like 6       | tcea16   | -1.57 | -1.55  |
| Ubiquitin-conjugating enzyme E2 L3                     | ube2l3   | -1.40 | -1.53  |
| Prothymosin alpha                                      | ptma     | -1.44 | -1.52  |
| Neuroblast differentiation-associated protein AHNAK    | ahnak    | -1.94 | -1.48  |
| Ras GTPase-activating-like protein IQGAP2              | iqgap2   | -2.47 | -1.47  |
| Vitrin                                                 | vit      | -2.65 | -1.45  |
| Transcription elongation factor A protein-like 5       | tcea15   | -1.52 | -1.45  |
| Methanethiol oxidase                                   | selenbp1 | -1.40 | -1.44  |
| Glia maturation factor beta                            | gmfb     | -1.32 | -1.44  |
| Protein S100-A10                                       | s100a10  | -2.00 | -1.43  |
| Astrocytic phosphoprotein PEA-15                       | pea15    | -1.30 | -1.43  |
| Glutathione S-transferase Mu 2                         | gstm2    | -2.35 | -1.42  |
| Enolase-phosphatase E1                                 | enoph1   | -1.44 | -1.41  |
| Calcium-binding mitochondrial carrier protein Aralar2  | slc25a13 | 1.30  | -1.40  |
| Aldose reductase                                       | akr1b1   | -1.87 | -1.39  |
| Annexin A1                                             | anxa1    | -3.79 | -1.35  |
| Gasdermin-E                                            | dfna5    | 1.52  | -1.34  |
| Complexin-2                                            | cplx2    | -1.67 | -1.34  |
| Fibrinogen gamma chain                                 | fgg      | 1.58  | -1.33  |
| C-reactive protein                                     | crp      | 1.37  | -1.32  |
| Glutathione synthetase                                 | gss      | -1.54 | -1.31  |
| Peptidyl-prolyl cis-trans isomerase FKBP3              | fkbp3    | -1.31 | -1.30  |
| Heat shock factor-binding protein 1                    | hsbp1    | -1.48 | 1.31   |
| Coronin-1A                                             | coro1a   | 1.51  | 1.32   |
| Retinoschelin                                          | rs1      | 1.44  | 1.34   |
| Carbonic anhydrase 1                                   | ca1      | 1.46  | 1.34   |
| Valacyclovir hydrolase                                 | bphl     | -1.47 | 1.39   |
| Enhancer of rudimentary homolog                        | erh      | -1.43 | 1.40   |
| SPARC-like protein 1                                   | sparcl1  | -2.13 | 1.41   |
| Guanine nucleotide-binding protein G                   | gnb3     | 1.31  | 1.48   |
| Proteasome activator complex subunit 2                 | psme2    | -1.84 | 1.50   |
| C-terminal-binding protein 2                           | ctbp2    | 1.32  | 1.56   |
| Dmx-like protein 2                                     | dmx2     | 1.32  | 1.56   |
| Tropomyosin alpha-3 chain                              | tpm3     | -1.34 | 1.60   |
| Cystatin-C                                             | cst3     | -2.66 | 1.70   |
| Neuronal membrane glycoprotein MG-b                    | gpm6b    | 1.40  | 2.06   |
| Cell cycle exit and neuronal differentiation protein 1 | caud1    | -1.30 | 2.09   |
| Neuronal membrane glycoprotein MG-a                    | gpm6a    | 1.38  | 2.16   |
| Apolipoprotein E                                       | apoe     | -1.99 | 2.40   |
| Synaptic vesicle glycoprotein 2A                       | sv2a     | 1.31  | 2.48   |

Figure 5B

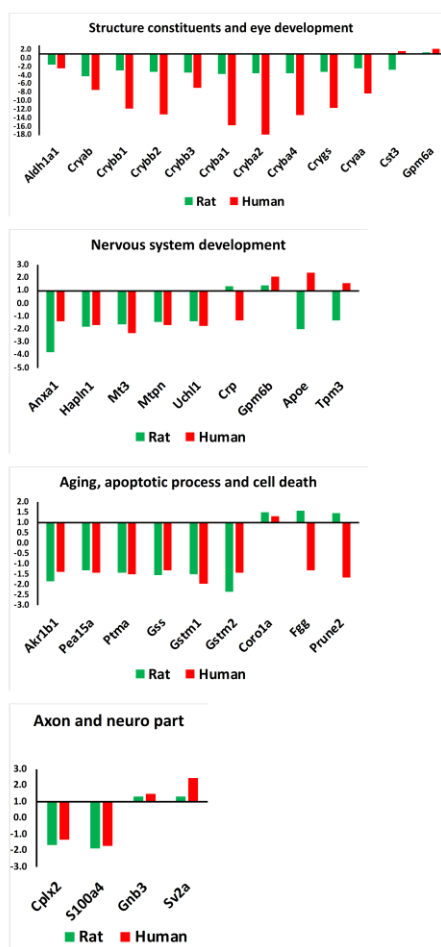

592

593

594 **Figure 5 (A)** Heatmap generated with the common regulated proteins in both rat and  
 595 human retina with glaucoma. Red and green colours indicate relative increase or  
 596 decrease (glaucoma vs control) in protein abundance, respectively. **(B)** The bar graphs  
 597 indicated 4 main pathways in which these common proteins are involved. The  
 598 regulation patterns of proteins are also revealed.

599

600

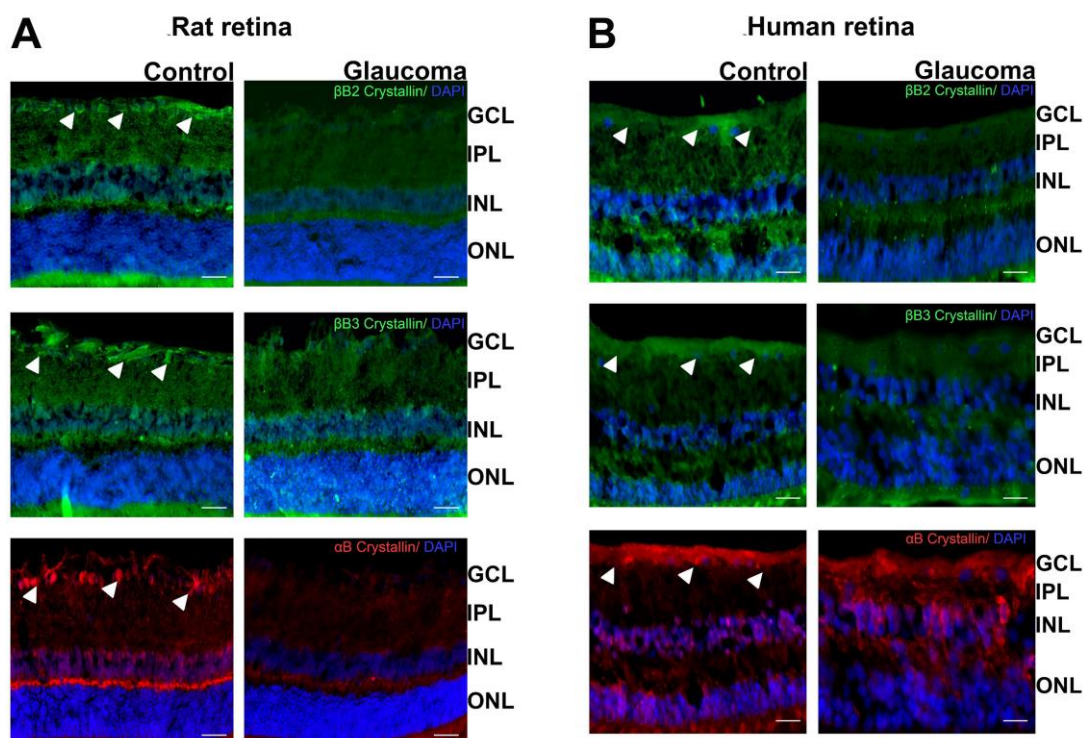

Figure 6

601

602 **Figure 6 (A)** Immunostaining of the retinal sections from controlled and glaucoma rats  
603 illustrating  $\beta$ 2-Crystallin (Green – Alexa Fluor 488),  $\beta$ 3-Crystallin (Green - FITC)  
604 and  $\alpha$ B Crystallin (Red – Cy3) expression (Blue-DAPI) (n=3 each). **(B)**  
605 Immunostaining of the retinal sections from controlled and glaucoma human  
606 postmortem tissues illustrating  $\beta$ 2-Crystallin (Green – Alexa Fluor 488),  $\beta$ 3-  
607 Crystallin (Green - FITC) and  $\alpha$ B Crystallin (Red – Cy3) expression (Blue-DAPI) (n=3  
608 each). Scale=50 $\mu$ m.

609

## 610 Tables

611 **Table 1** The list of proteins identified in the control and glaucoma retinal samples,  
612 including differentially expressed proteins identified from pairwise comparison test of  
613 Glaucoma vs. Control (student t-test, p-value  $\leq 0.05$  and  $\geq 1.2$ -fold difference).  
614 (<https://data.mendeley.com/research-data/>)

615

616

617

618 **References:**

619

- 620 Alqawlaq S, Huzil JT, Ivanova MV, Foldvari M. 2012. Challenges in neuroprotective nanomedicine  
621 development: progress towards noninvasive gene therapy of glaucoma. *Nanomedicine* 7:1067-1083.
- 622 Anders F, Teister J, Funke S, Pfeiffer N, Grus F, Solon T, Prokosch V. 2017. Proteomic profiling  
623 reveals crucial retinal protein alterations in the early phase of an experimental glaucoma model.  
624 *Graefes Arch Clin Exp Ophthalmol* 255:1395-1407.
- 625 Bhattacharya SK, Crabb JS, Bonilha VL, Gu X, Takahara H, Crabb JW. 2006. Proteomics implicates  
626 peptidyl arginine deiminase 2 and optic nerve citrullination in glaucoma pathogenesis. *Invest*  
627 *Ophthalmol Vis Sci* 47:2508-14.
- 628 Cai X, Du J, Liu Y, Xia W, Liu J, Zou M, Wang Y, Wang M, Su H, Xu D. 2013. Identification and  
629 characterization of receptor-interacting protein 2 as a TNFR-associated factor 3 binding partner. *Gene*  
630 517:205-11.
- 631 Chick JM, Munger SC, Simecek P, Huttlin EL, Choi K, Gatti DM, Raghupathy N, Svenson KL,  
632 Churchill GA, Gygi SP. 2016. Defining the consequences of genetic variation on a proteome-wide  
633 scale. *Nature* 534:500-505.
- 634 Chitranshi N, Dheer Y, Abbasi M, You Y, Graham SL, Gupta V. 2018a. Glaucoma Pathogenesis and  
635 Neurotrophins: Focus on the Molecular and Genetic Basis for Therapeutic Prospects. *Curr*  
636 *Neuropharmacol* 16:1018-1035.
- 637 Chitranshi N, Dheer Y, Mirzaei M, Wu Y, Salekdeh GH, Abbasi M, Gupta V, Vander Wall R, You Y,  
638 Graham SL, Gupta V. 2018b. Loss of Shp2 Rescues BDNF/TrkB Signaling and Contributes to  
639 Improved Retinal Ganglion Cell Neuroprotection. *Mol Ther*.
- 640 Chitranshi N, Dheer Y, Mirzaei M, Wu Y, Salekdeh GH, Abbasi M, Gupta V, Vander Wall R, You Y,  
641 Graham SL, Gupta V. 2019. Loss of Shp2 Rescues BDNF/TrkB Signaling and Contributes to  
642 Improved Retinal Ganglion Cell Neuroprotection. *Mol Ther* 27:424-441.
- 643 Chrysostomou V, Rezanian F, Trounce IA, Crowston JG. 2013. Oxidative stress and mitochondrial  
644 dysfunction in glaucoma. *Curr Opin Pharmacol* 13:12-5.
- 645 Clark AF, Miggans ST, Wilson K, Browder S, McCartney MD. 1995. Cytoskeletal changes in cultured  
646 human glaucoma trabecular meshwork cells. *J Glaucoma* 4:183-8.
- 647 Dismuke WM, McKay BS, Stamer WD. 2012. Myocilin, a component of a membrane-associated  
648 protein complex driven by a homologous Q-SNARE domain. *Biochemistry* 51:3606-13.
- 649 Elias JE, Gygi SP. 2010. Target-Decoy Search Strategy for Mass Spectrometry-Based Proteomics. In  
650 Hubbard SJ, Jones AR, editor^editors. *Proteome Bioinformatics*. Totowa, NJ: Humana Press, p 55-71.
- 651 Frost LS, Mitchell CH, Boesze-Battaglia K. 2014. Autophagy in the eye: implications for ocular cell  
652 health. *Exp Eye Res* 124:56-66.
- 653 Funke S, Perumal N, Beck S, Gabel-Scheurich S, Schmelter C, Teister J, Gerbig C, Gramlich OW,  
654 Pfeiffer N, Grus FH. 2016. Glaucoma related Proteomic Alterations in Human Retina Samples. *Sci Rep*  
655 6:29759.
- 656 Gupta V, You Y, Li J, Gupta V, Golzan M, Klistorner A, van den Buuse M, Graham S. 2014. BDNF  
657 impairment is associated with age-related changes in the inner retina and exacerbates experimental  
658 glaucoma. *Biochimica et Biophysica Acta (BBA) - Molecular Basis of Disease* 1842:1567-1578.
- 659 Hoare MJ, Grierson I, Brotchie D, Pollock N, Cracknell K, Clark AF. 2009. Cross-linked actin  
660 networks (CLANs) in the trabecular meshwork of the normal and glaucomatous human eye in situ.  
661 *Invest Ophthalmol Vis Sci* 50:1255-63.
- 662 Horita S, Simsek E, Simsek T, Yildirim N, Ishiura H, Nakamura M, Satoh N, Suzuki A, Tsukada H,  
663 Mizuno T, Seki G, Tsuji S, Nangaku M. 2018. SLC4A4 compound heterozygous mutations in exon-  
664 intron boundary regions presenting with severe proximal renal tubular acidosis and extrarenal  
665 symptoms coexisting with Turner's syndrome: a case report. *BMC Med Genet* 19:103.
- 666 Hüttemann M, Lee I, Samavati L, Yu H, Doan JW. 2007. Regulation of mitochondrial oxidative  
667 phosphorylation through cell signaling. *Biochimica et Biophysica Acta (BBA) - Molecular Cell*  
668 *Research* 1773:1701-1720.
- 669 Huttlin EL, Ting L, Bruckner RJ, Gebreab F, Gygi MP, Szpyt J, Tam S, Zarraga G, Colby G, Baltier K.  
670 2015. The BioPlex network: a systematic exploration of the human interactome. *Cell* 162:425-440.
- 671 Ishikawa K, Yoshida S, Kadota K, Nakamura T, Niuro H, Arakawa S, Yoshida A, Akashi K, Ishibashi  
672 T. 2010. Gene expression profile of hyperoxic and hypoxic retinas in a mouse model of oxygen-  
673 induced retinopathy. *Invest Ophthalmol Vis Sci* 51:4307-19.
- 674 Jacobsen AV, Murphy JM. 2017. The secret life of kinases: insights into non-catalytic signalling  
675 functions from pseudokinases. *Biochem Soc Trans* 45:665-681.

676 Job R, Raja V, Grierson I, Currie L, O'Reilly S, Pollock N, Knight E, Clark AF. 2010. Cross-linked  
677 actin networks (CLANs) are present in lamina cribrosa cells. *Br J Ophthalmol* 94:1388-92.  
678 Kass MA, Heuer DK, Higginbotham EJ, Johnson CA, Keltner JL, Miller JP, Parrish RK, 2nd, Wilson  
679 MR, Gordon MO. 2002. The Ocular Hypertension Treatment Study: a randomized trial determines that  
680 topical ocular hypotensive medication delays or prevents the onset of primary open-angle glaucoma.  
681 *Arch Ophthalmol* 120:701-13; discussion 829-30.  
682 Kim KY, Perkins GA, Shim MS, Bushong E, Alcasid N, Ju S, Ellisman MH, Weinreb RN, Ju WK.  
683 2015. DRP1 inhibition rescues retinal ganglion cells and their axons by preserving mitochondrial  
684 integrity in a mouse model of glaucoma. *Cell Death Dis* 6:e1839.  
685 Komatsu M, Wang QJ, Holstein GR, Friedrich VL, Jr., Iwata J, Kominami E, Chait BT, Tanaka K,  
686 Yue Z. 2007. Essential role for autophagy protein Atg7 in the maintenance of axonal homeostasis and  
687 the prevention of axonal degeneration. *Proc Natl Acad Sci U S A* 104:14489-94.  
688 Kong GYX, Van Bergen NJ, Trounce IA, Crowston JG. 2009. Mitochondrial Dysfunction and  
689 Glaucoma. *Journal of Glaucoma* 18:93-100.  
690 Kulak NA, Pichler G, Paron I, Nagaraj N, Mann M. 2014. Minimal, encapsulated proteomic-sample  
691 processing applied to copy-number estimation in eukaryotic cells. *Nature methods* 11:319-324.  
692 Launay N, Goudeau B, Kato K, Vicart P, Lilienbaum A. 2006. Cell signaling pathways to alphaB-  
693 crystallin following stresses of the cytoskeleton. *Exp Cell Res* 312:3570-84.  
694 Lee D, Kim KY, Shim MS, Kim SY, Ellisman MH, Weinreb RN, Ju WK. 2014. Coenzyme Q10  
695 ameliorates oxidative stress and prevents mitochondrial alteration in ischemic retinal injury. *Apoptosis*  
696 19:603-14.  
697 Lee S, Van Bergen NJ, Kong GY, Chrysostomou V, Waugh HS, O'Neill EC, Crowston JG, Trounce  
698 IA. 2011. Mitochondrial dysfunction in glaucoma and emerging bioenergetic therapies. *Exp Eye Res*  
699 93:204-12.  
700 Levi M, van der Poll T. 2010. Inflammation and coagulation. *Crit Care Med* 38:S26-34.  
701 Liang XH, Sun H, Nichols JG, Allen N, Wang S, Vickers TA, Shen W, Hsu CW, Crooke ST. 2018.  
702 COPII vesicles can affect the activity of antisense oligonucleotides by facilitating the release of  
703 oligonucleotides from endocytic pathways. *Nucleic Acids Res* 46:10225-10245.  
704 Liedtke T, Schwamborn JC, Schröer U, Thanos S. 2007. Elongation of Axons during Regeneration  
705 Involves Retinal Crystallin  $\beta$  2 (crybb2). *Molecular & Cellular Proteomics* 6:895-907.  
706 Liu Y, Allingham RR, Qin X, Layfield D, Dellinger AE, Gibson J, Wheeler J, Ashley-Koch AE,  
707 Stamer WD, Hauser MA. 2013. Gene expression profile in human trabecular meshwork from patients  
708 with primary open-angle glaucoma. *Invest Ophthalmol Vis Sci* 54:6382-9.  
709 Manca F, Pincet F, Truskinovsky L, Rothman JE, Foret L, Caruel M. 2019. SNARE machinery is  
710 optimized for ultrafast fusion. *Proc Natl Acad Sci U S A* 116:2435-2442.  
711 McAlister GC, Huttlin EL, Haas W, Ting L, Jedrychowski MP, Rogers JC, Kuhn K, Pike I, Grothe RA,  
712 Blethrow JD. 2012. Increasing the multiplexing capacity of TMTs using reporter ion isotopologues  
713 with isobaric masses. *Analytical chemistry* 84:7469-7478.  
714 McAlister GC, Nusinow DP, Jedrychowski MP, Wühr M, Huttlin EL, Erickson BK, Rad R, Haas W,  
715 Gygi SP. 2014. MultiNotch MS3 enables accurate, sensitive, and multiplexed detection of differential  
716 expression across cancer cell line proteomes. *Analytical chemistry* 86:7150-7158.  
717 McKay BS, Congrove NR, Johnson AA, Dismuke WM, Bowen TJ, Stamer WD. 2013. A role for  
718 myocilin in receptor-mediated endocytosis. *PLoS One* 8:e82301.  
719 McMonnies CW. 2017. Glaucoma history and risk factors. *J Optom* 10:71-78.  
720 Mirzaei M, Deng L, Gupta VB, Graham S, Gupta V. 2020. Complement pathway in Alzheimer's  
721 pathology and retinal neurodegenerative disorders - the road ahead. *Neural Regen Res* 15:257-258.  
722 Mirzaei M, Gupta VB, Chick JM, Greco TM, Wu Y, Chitranshi N, Wall RV, Hone E, Deng L, Dheer  
723 Y, Abbasi M, Rezaeian M, Braidy N, You Y, Salekdeh GH, Haynes PA, Molloy MP, Martins R,  
724 Cristea IM, Gygi SP, Graham SL, Gupta VK. 2017a. Age-related neurodegenerative disease associated  
725 pathways identified in retinal and vitreous proteome from human glaucoma eyes. *Sci Rep* 7:12685.  
726 Mirzaei M, Pascovici D, Wu JX, Chick J, Wu Y, Cooke B, Haynes P, Molloy MP. 2017b. TMT One-  
727 Stop Shop: From Reliable Sample Preparation to Computational Analysis Platform. In Keerthikumar S,  
728 Mathivanan S, editor^editors. *Proteome Bioinformatics*. New York, NY: Springer New York, p 45-66.  
729 Moreno MC, Campanelli J, Sande P, Sáenz DA, Keller Sarmiento MI, Rosenstein RE. 2004. Retinal  
730 Oxidative Stress Induced by High Intraocular Pressure. *Free Radical Biology and Medicine* 37:803-  
731 812.  
732 Munemasa Y, Kitaoka Y, Kuribayashi J, Ueno S. 2010. Modulation of mitochondria in the axon and  
733 soma of retinal ganglion cells in a rat glaucoma model. *J Neurochem* 115:1508-19.  
734 Piri N, Song M, Kwong JMK, Caprioli J. 2007. Modulation of alpha and beta crystallin expression in  
735 rat retinas with ocular hypertension-induced ganglion cell degeneration. *Brain Research* 1141:1-9.



736 Porter K, Nallathambi J, Lin Y, Liton PB. 2013. Lysosomal basification and decreased autophagic flux  
737 in oxidatively stressed trabecular meshwork cells: implications for glaucoma pathogenesis. *Autophagy*  
738 9:581-94.

739 Prokosch V, Schallenberg M, Thanos S. 2013. Crystallins Are Regulated Biomarkers for Monitoring  
740 Topical Therapy of Glaucomatous Optic Neuropathy. *PLOS ONE* 8:e49730.

741 Stowell C, Arbogast B, Cioffi G, Burgoyne C, Zhou A. 2011. Retinal proteomic changes following  
742 unilateral optic nerve transection and early experimental glaucoma in non-human primate eyes. *Exp*  
743 *Eye Res* 93:13-28.

744 Swarup G, Sayyad Z. 2018. Altered Functions and Interactions of Glaucoma-Associated Mutants of  
745 Optineurin. *Front Immunol* 9:1287.

746 Szklarczyk D, Franceschini A, Wyder S, Forslund K, Heller D, Huerta-Cepas J, Simonovic M, Roth A,  
747 Santos A, Tsafou KP, Kuhn M, Bork P, Jensen LJ, von Mering C. 2015. STRING v10: protein-protein  
748 interaction networks, integrated over the tree of life. *Nucleic Acids Research* 43:D447-D452.

749 Tezel G. 2013. A proteomics view of the molecular mechanisms and biomarkers of glaucomatous  
750 neurodegeneration. *Prog Retin Eye Res* 35:18-43.

751 Tezel G. 2014. A decade of proteomics studies of glaucomatous neurodegeneration. *Proteomics Clin*  
752 *Appl* 8:154-67.

753 Tezel G, Seigel GM, Wax MB. 1998. Autoantibodies to small heat shock proteins in glaucoma.  
754 *Investigative Ophthalmology & Visual Science* 39:2277-2287.

755 Tezel G, Yang X, Cai J. 2005. Proteomic identification of oxidatively modified retinal proteins in a  
756 chronic pressure-induced rat model of glaucoma. *Invest Ophthalmol Vis Sci* 46:3177-87.

757 Tian H, Wang L, Cai R, Zheng L, Guo L. 2014. Identification of protein network alterations upon  
758 retinal ischemia-reperfusion injury by quantitative proteomics using a *Rattus norvegicus* model. *PLoS*  
759 *One* 9:e116453.

760 Wang DY, Ray A, Rodgers K, Ergorul C, Hyman BT, Huang W, Grosskreutz CL. 2010. Global gene  
761 expression changes in rat retinal ganglion cells in experimental glaucoma. *Invest Ophthalmol Vis Sci*  
762 51:4084-95.

763 Wessel D, Flügge UI. 1984. A method for the quantitative recovery of protein in dilute solution in the  
764 presence of detergents and lipids. *Analytical biochemistry* 138:141-143.

765 Williams PA, Harder JM, Foxworth NE, Cochran KE, Philip VM, Porciatti V, Smithies O, John SW.  
766 2017. Vitamin B3 modulates mitochondrial vulnerability and prevents glaucoma in aged mice. *Science*  
767 355:756-760.

768 You Y, Gupta VK, Li JC, Al-Adawy N, Klistorner A, Graham SL. 2014. FTY720 Protects Retinal  
769 Ganglion Cells in Experimental Glaucoma FTY720 Protects RGCs. *Investigative Ophthalmology &*  
770 *Visual Science* 55:3060-3066.

771 You Y, Thie J, Klistorner A, Gupta VK, Graham SL. 2012. Normalization of visual evoked potentials  
772 using underlying electroencephalogram levels improves amplitude reproducibility in rats. *Invest*  
773 *Ophthalmol Vis Sci* 53:1473-8.

774 Yu DH, Zhang X, Wang H, Zhang L, Chen H, Hu M, Dong Z, Zhu G, Qian Z, Fan J, Su X, Xu Y,  
775 Zheng L, Dong H, Yin X, Ji Q, Ji J. 2014. The essential role of TNIK gene amplification in gastric  
776 cancer growth. *Oncogenesis* 2:e89.

777 Zagajewska K, Piatkowska M, Goryca K, Balabas A, Kluska A, Paziewska A, Pospiech E, Grabska-  
778 Liberek I, Hennig EE. 2018. GWAS links variants in neuronal development and actin remodeling  
779 related loci with pseudoexfoliation syndrome without glaucoma. *Exp Eye Res* 168:138-148.

780

781
